# Supplementary material for: Role of the non-conserved amino acid asparagine 285 in the glycone-binding pocket of Neosartorya fischeri β-glucosidase
Source: Royal Society of Chemistry journal article supplement (doi:10.1039/c5ra28017f), 2016-01-01
Supplement: c5ra28017f1.pdf [file c5ra28017f1.pdf]

## Supplementary Material

# Role of the non-conserved amino acid Asparagine 285 in the glycone-binding pocket of *Neosartorya fischeri* $\beta$ -glucosidase

Priyadharshini Ramachandran,<sup>a,+</sup> Sujit Sadashiv Jagtap,<sup>a,+</sup> Sanjay K. S. Patel,<sup>a</sup> Jinglin Li,<sup>a</sup> Yun Chan Kang<sup>b,\*</sup>, Jung-Kul Lee<sup>b,\*</sup>

<sup>a</sup>Department of Chemical Engineering, Konkuk University, 1 Hwayang-Dong, Gwangjin-Gu, Seoul 143-701, Republic of Korea

<sup>b</sup>Department of Material Science and Technology, Korea University, Seoul 136-713, Republic of Korea

<sup>+</sup>These authors equally contributed to this paper.

\*Author for correspondence.

E-mail: jkrhee@konkuk.ac.kr

E-mail: yckang@korea.ac.kr

## Supplementary Fig. S1

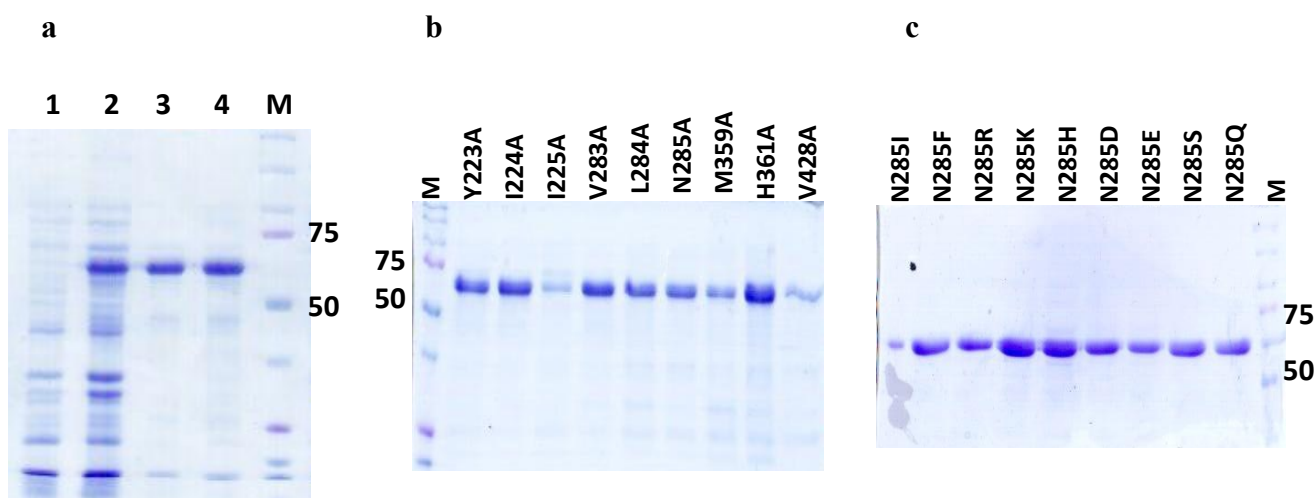

**Supplementary Fig. S1** Analysis of protein expression for NfBGL595 and its mutants. **(a)** Purification and determination of the subunit molecular mass by SDS-PAGE. Lane 1 shows the soluble fraction of *E. coli* expressing pET28a; lane 2 shows the soluble fraction expressing pET28a-bgl1; lane 3 and 4 show the purified NfBGL1; and lane M is the marker. **(b)** SDS-PAGE analysis of the NfBGL595 mutants. Lane M contains the protein marker and lanes Y223A, I224A, I225A, V283A, L284A, N285A, M359A, H361A, and V428A correspond to the purified mutant enzymes with a molecular weight of ~60 kDa. **(c)** SDS-PAGE analysis of the N285 mutants. Lane M contains the protein marker and lanes N285I, N285F, N285R, N285K, N285H, N285D, N285E, N285S, and N285Q correspond to the purified mutant enzymes with a molecular weight of ~60 kDa.

Supplementary Fig. S2a

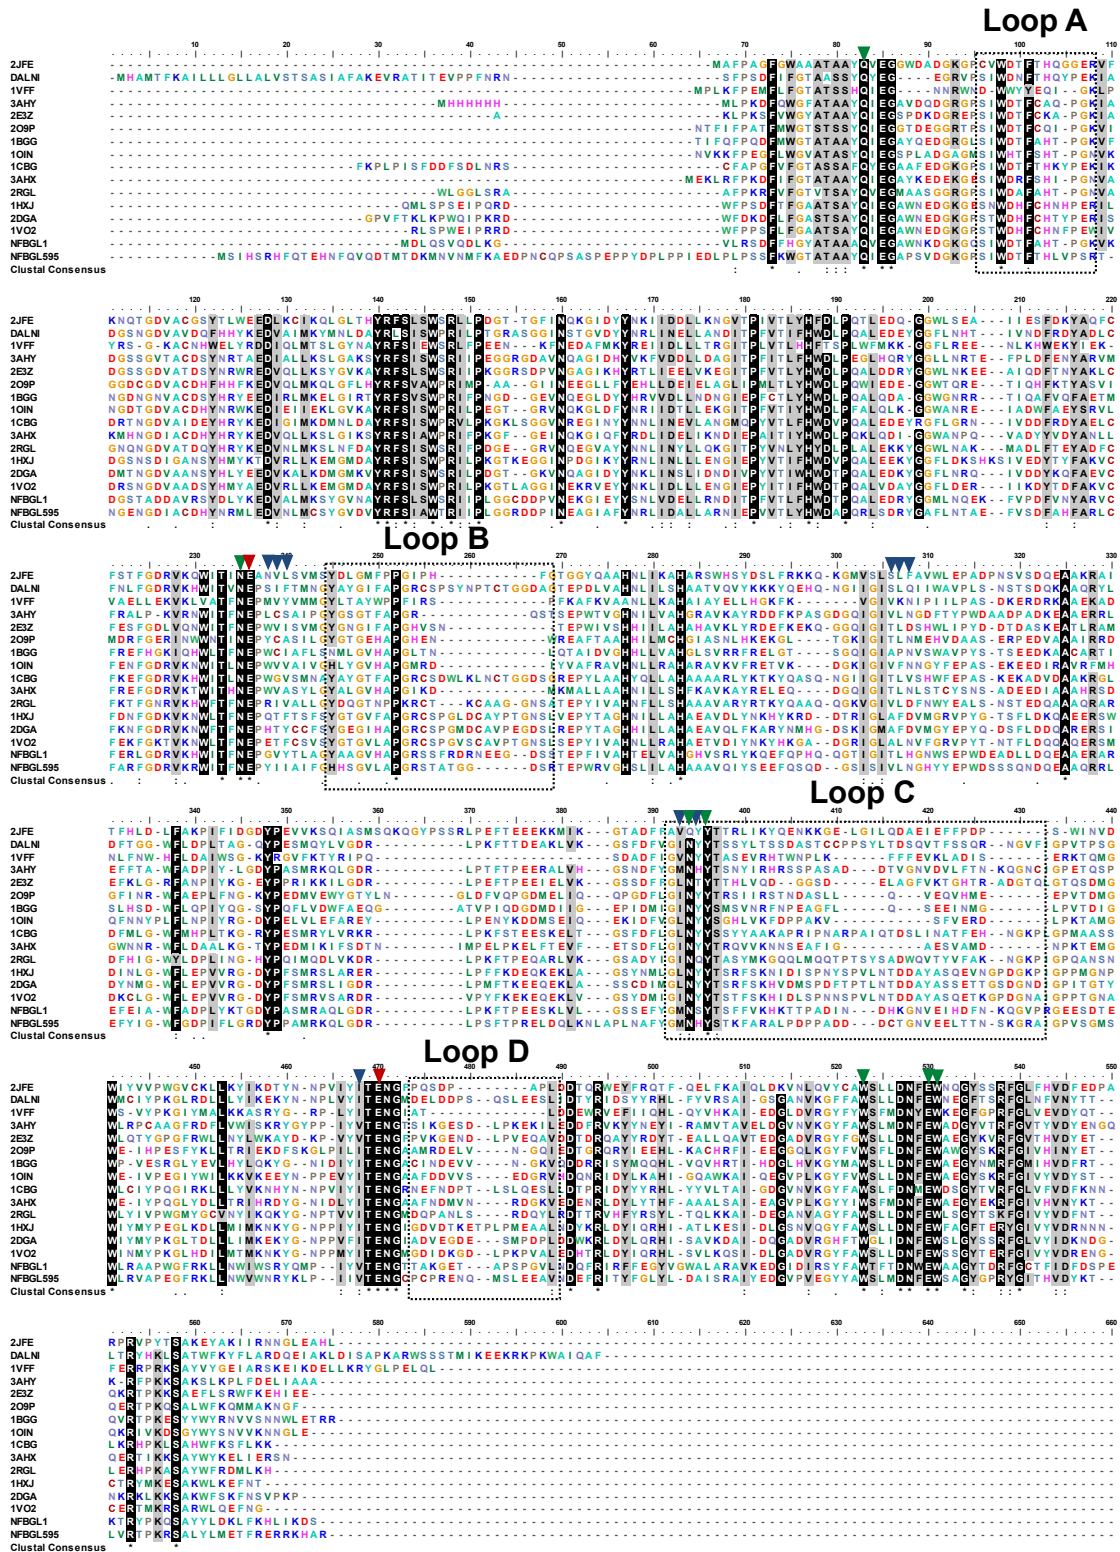

**Supplementary Fig. S2a** Sequence alignment of BGL from various sources. The glycone binding residues, active site residues, and non-conserved residues are indicated by green, red, and blue inverted triangles, respectively. The major loops A, B, C, and D are boxed with dotted lines. The codes 2JFE, DALNI, 1VFF, 3AHY, 2E3Z, 2O9P, 1BGG, 1OIN, 1CGB, 3AHX, 2RGL, 1HXJ, 2DGA, 1VO2, NfBGL1, and NfBGL595 correspond to  $\beta$ -glucosidases from *Homo sapiens*, *Dalbergia nigrescens*, *Pyrococcus horikoshii*, *Trichoderma reesei*, *Phanerochaete chrysosporium*, *Paenibacillus polymyxa* BGLB, *Paenibacillus Polymyxa* BGLA, *Thermotoga Maritima*, *Trifolium repens*, *Clostridium cellulovorans*, *Oryza sativa*, *Zea mays*, *Triticum aestivum*, *Sorghum bicolor*, *N. fischeri* BGL1, and *N. fischeri* BGL595, respectively. DALNI, NfBGL1, and NfBGL595 protein accession numbers are A3RF67, XM\_001263203.1, and XM\_001258595.1, respectively. Other codes represent the PDB codes.

**Supplementary Fig. S2b**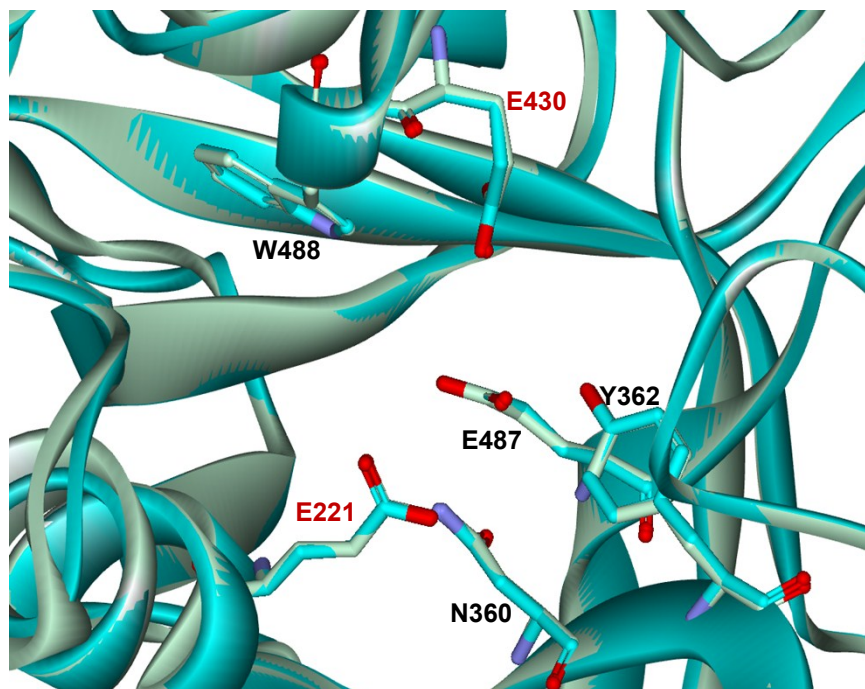

**Supplementary Fig. S2b** Molecular modeling of the active site pocket of NfBGL595 (cyan). Active site residues were superimposed on the template TrBGL2 (gray). Based on the superimposition, the active site residues and conserved residues of NfBGL595 (E221, N360, Y362, E430, E487, and W488) and those of TrBGL2 (E165, N296, Y298, E367, E424, and W425) have a similar orientation and position.

## Supplementary Fig. S3

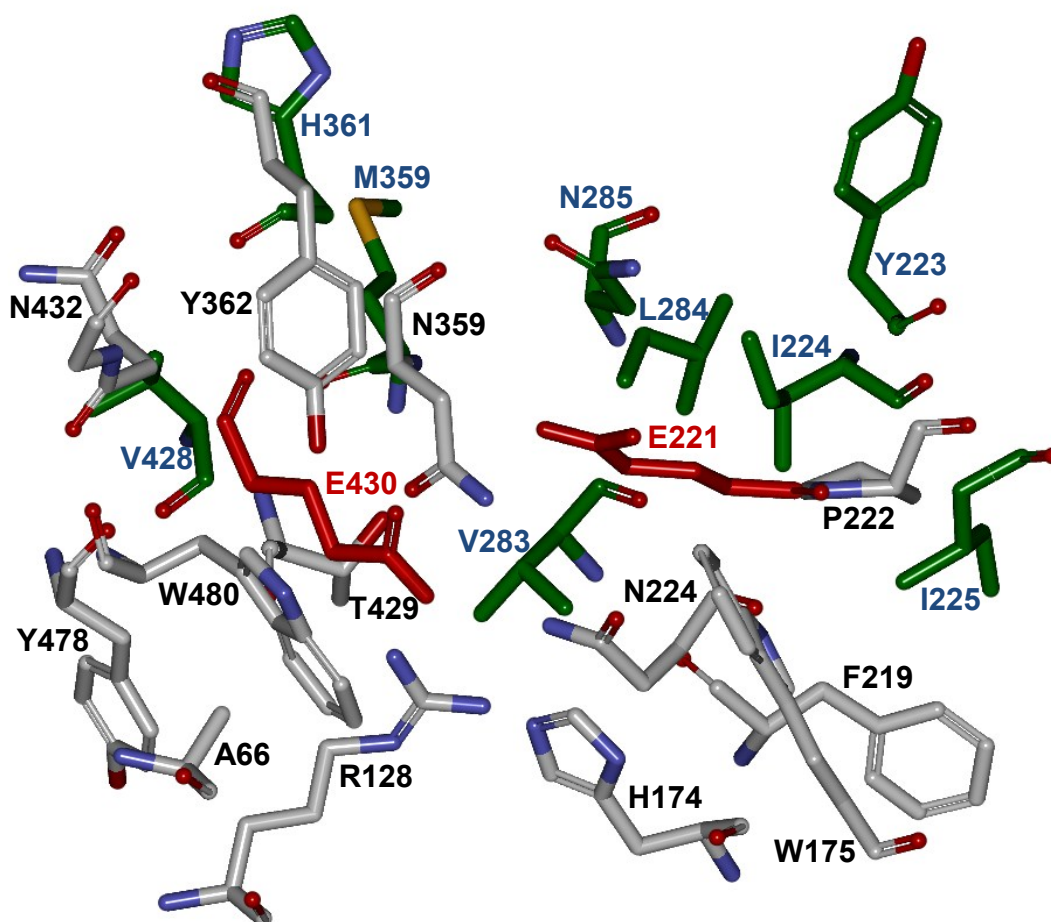

**Supplementary Fig. S3** Residues in the substrate-binding pocket of NfBGL595 from *N. fischeri*. Conserved residues (grey) and non-conserved residues (green) around the catalytic amino acids (red) are shown.

Supplementary Fig. S4

a

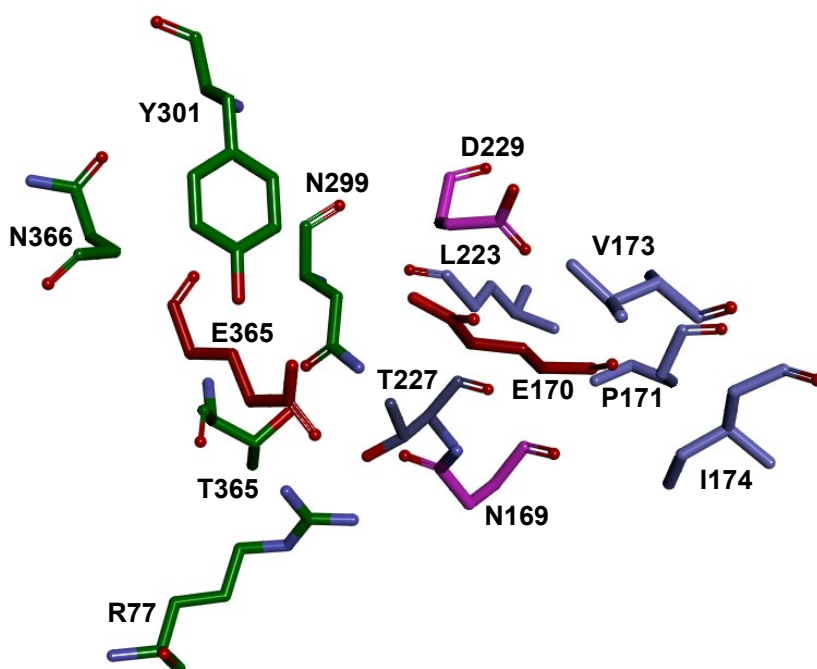

b

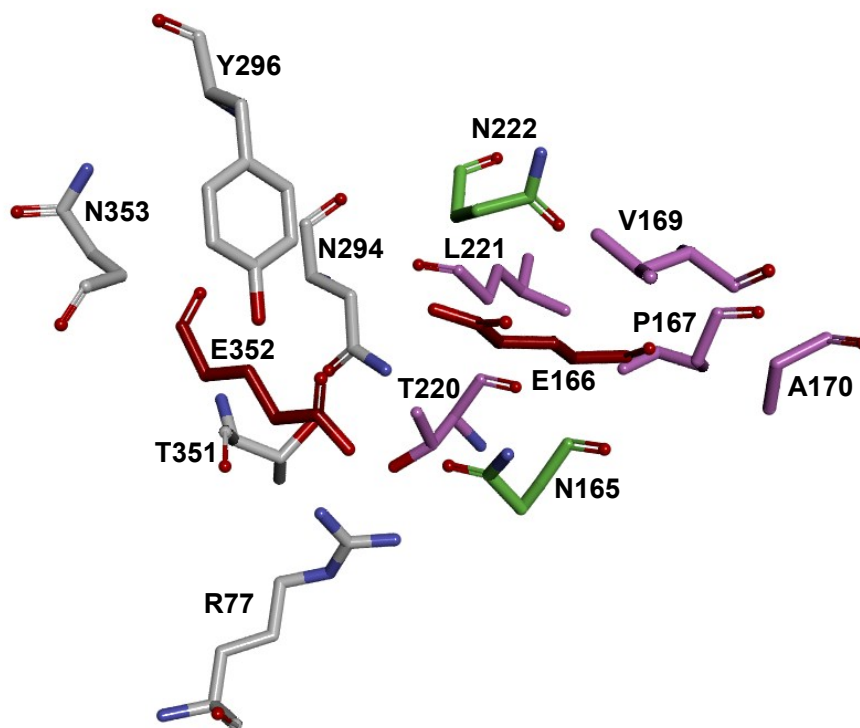

**Supplementary Fig. S4** Distribution of the polar and non-polar residues in the substrate-binding pocket of BGL from *P. chrysosporium* (2E3Z) and *T. reesei* (3AHY). The catalytic nucleophile residue E365 of 2E3Z is surrounded by the polar residues R77, N299, Y301, and T365, and in 3AHY, the nucleophile E352 is surrounded by R77, N294, Y296, and T351. Whereas the general acid/base residue E170 of 2E3Z is dominated by the non-polar residues L223, V173, P171, and I174, the acid/base residue E166 of 3AHY is dominated by L221, V169, P167, and A170. *P. chrysosporium* (2E3Z) and *T. reesei* (3AHY) have D229 and N222 residue, respectively, at the equivalent position of N285 from NfBGL595. The catalytic residues are shown in red.



**Supplementary Table S1** List of oligonucleotide primers used in the study. The mutation site is bold faced underlined.

| Primer name   | Sequence (5' to 3')                         |
|---------------|---------------------------------------------|
| Y223A Forward | ATTACGTTTAAACGAGCCT <b>GCG</b> ATCATCGCGATC |
| Y223A Reverse | AGGCTCGTTAAACGTAATCCATCTCTTGAC              |
| I224A Forward | GTTTAAACGAGCCTTAT <b>GCG</b> ATCGCGATC      |
| I224A Reverse | ATAAGGCTCGTTAAACGTAATCCATCTC                |
| I225A Forward | AACGAGCCTTATATC <b>GCG</b> GGCGATCTTTG      |
| I225A Reverse | GATATAAGGCTCGTTAAACGTAATCCA                 |
| V283A Forward | ATGGGAGCATCTCAATC <b>GCG</b> CTGAATG        |
| V283A Reverse | CGATTGAGATGCTCCCATCCTGCGA                   |
| L284A Forward | GAGCATCTCAATCGTG <b>GCG</b> AATGGGCAC       |
| L284A Reverse | CACGATTGAGATGCTCCCATCCTGCGA                 |
| N285A Forward | ATCTCAATCGTGCTG <b>GCG</b> GGGCACTATTAC     |
| N285A Reverse | CAGCACGATTGAGATGCTCCCATCCTG                 |
| M359A Forward | AACGCCTTCTACGGAG <b>GCA</b> AACCACTACTCC    |
| M359A Reverse | GGGCGAGTTGCGGAAGATGCCTTACTTG                |
| H361A Forward | CCTTCTACGGAATGAAC <b>GCG</b> TACTCCACCAA    |
| H361A Reverse | GTTCATTCGTTAGAAGGCGTTGAGCGGGGC              |
| V428A Forward | GTACAAGCTGCCTATCATT <b>GCG</b> ACAGAGAATGG  |
| V428A Reverse | CAATGATAGGCAGCTTGTACCGATTCCACA              |
| N285 Reverse  | CAGCACGATTGAGATGCTCCCATCCTGCGA              |
| N285H Forward | AGCATCTCAATCGTGCTGC <b>ACG</b> GGCACTATTAC  |
| N285F Forward | AGCATCTCAATCGTGCTGC <b>ACG</b> GGCACTATTAC  |
| N285I Forward | CATCTCAATCGTGCTG <b>ATT</b> GGGCACTATTA     |
| N285I Reverse | TCAGCACGATTGAGATGCTCCCATCCTGCG              |
| N285D Forward | CATCTCAATCGTGCTG <b>GAT</b> GGGCACTATT      |
| N285S Forward | GCATCTCAATCGTGCTG <b>AGC</b> GGGCACTA       |
| N285S Reverse | TCAGCACGATTGAGATGCTCCCATCCTG                |
| N285E Forward | ATCTCAATCGTGCTG <b>GA</b> AGGGCACTATT       |
| N285R Forward | ATCTCAATCGTGCTG <b>GCT</b> GGGCACTATT       |
| N285K Forward | CTCAATCGTGCTG <b>AA</b> AGGGCACTATTAC       |
| N285Q Forward | AGCATCTCAATCGTGCTGC <b>AG</b> GGGCACTATTAC  |

N285 Reverse acts as a common primer for N285H Forward, N285F Forward, N285D Forward, N285E Forward, N285R Forward, N285K Forward, and N285Q Forward primers.

**Supplementary Table S2** Properties of BGLs active toward flavones from various sources.

| BGL Source                                    | Flavone substrates                   | $K_m$ (mM)    | $k_{cat}/K_m$<br>(mM <sup>-1</sup> s <sup>-1</sup> ) | Reference             |
|-----------------------------------------------|--------------------------------------|---------------|------------------------------------------------------|-----------------------|
| <i>Thermotoga neapolitana</i> (recombinant)   | Quercetin-3-glucoside                | 0.06 ± 0.03   | 0.055                                                | (Khan et al. 2011)    |
|                                               | Quercetin-3,4-glucosides             | 0.13 ± 0.06   | 0.122                                                |                       |
| <i>Aspergillus oryzae</i> RIB40               | Daidzein                             | ND            | ND                                                   | (Kaya et al. 2008)    |
|                                               | Genistein                            |               |                                                      |                       |
|                                               | Glycitein                            |               |                                                      |                       |
| <i>Aspergillus oryzae</i> CBS 12559 (native)  | Quercetin                            | -             | -                                                    | (Riou et al. 1998)    |
|                                               | Naringin                             |               |                                                      |                       |
| <i>Saccharomyces cerevisiae</i> (recombinant) | NAR 7-glucoside                      | +             | -                                                    | (Schmidt et al. 2011) |
|                                               | Eriodictyol 7- <i>O</i> -β-glucoside | +             |                                                      |                       |
|                                               | Lu 4-gluc                            | +             |                                                      |                       |
|                                               | Genistin                             | +             |                                                      |                       |
|                                               | Daidzein                             | +             |                                                      |                       |
| <i>Penicillium decumbens</i> (native) GI/GII  | Daidzein-7-glucoside                 | 0.97/0.65     | 0.335/1.65                                           | (Mamma et al. 2004)   |
|                                               | Quercetin-3-rhamnoside               | ND/ND         | ND/ND                                                |                       |
|                                               | Kaempferol-3-glucoside               | ND/ND         | ND/ND                                                |                       |
|                                               | Quercetin-3-glucoside                | ND/0.06       | ND/0.01                                              |                       |
|                                               | Apigenin-7-glucoside                 | 0.54/0.41     | 0.30/1.5                                             |                       |
|                                               | Naringenin-7-glucoside               | 0.67/0.45     | 0.28/1.39                                            |                       |
| <i>Neosartorya fischeri</i> (recombinant)     | Quercetin 3-β-D-glucoside            | 0.65 ± 0.08   | 759                                                  | This study            |
|                                               | Hesperetin 7-Rhamnoglucoside         | 1.06 ± 0.19   | 9.42                                                 |                       |
|                                               | Genistein-7-glucose                  | 0.075 ± 0.014 | 1670                                                 |                       |
|                                               | Apigenin-7-glucose                   | 0.030 ± 0.005 | 747                                                  |                       |
|                                               | Kaempferol-7-glucose                 | 0.17 ± 0.02   | 98.8                                                 |                       |

## Reference

- Kaya M, Ito J, Kotaka A, Matsumura K, Bando H, Sahara H, Ogino C, Shibasaki S, Kuroda K, Ueda M, Kondo A, Hata Y (2008) Isoflavone aglycones production from isoflavone glycosides by display of beta-glucosidase from *Aspergillus oryzae* on yeast cell surface. *Appl Microbiol Biotechnol* 79(1):51-60.
- Khan S, Pozzo T, Megyeri M, Lindahl S, Sundin A, Turner C, Karlsson EN (2011) Aglycone specificity of *Thermotoga neapolitana* beta-glucosidase 1A modified by mutagenesis, leading to increased catalytic efficiency in quercetin-3-glucoside hydrolysis. *BMC Biochem* 12:11.
- Mamma D, Hatzinkdaou DG, Christakopoulos. P (2004) Biochemical and catalytic properties of two intracellular beta-glucosidases from the fungus *Penicillium decumbens* active on flavonoid glucosides. *J Mol Catal* 27:183-190.
- Riou C, Salmon JM, Vallier MJ, Gunata Z, Barre P (1998) Purification, characterization, and substrate specificity of a novel highly glucose-tolerant beta-glucosidase from *Aspergillus oryzae*. *Appl Environ Microbiol* 64(10):3607-14.
- Schmidt S, Rainieri S, Witte S, Matern U, Martens S (2011) Identification of a *Saccharomyces cerevisiae* glucosidase that hydrolyzes flavonoid glucosides. *Appl Environ Microbiol* 77(5):1751-7.
